# Supplementary material for: Zinc tungstate encapsulated into a scarce Zn(ii)–viologen framework with photochromic, electrochromic and chemochromic properties
Source: Royal Society of Chemistry journal article supplement (doi:10.1039/d3dt03647b), 2024-01-01
Supplement: d3dt03647b1.pdf [file d3dt03647b1.pdf]

## Supporting information

# Zinctungstate Encapsulated into infrequent Zn(II)-Viologen Framework with Photochromic, Electrochromic and Chemochromic Properties

Li Huang, Xiao-Nan Li, Yuan Shen, Run-Hong Song, Wen-Bo Cui and Hong Zhang\*

Key Laboratory of Polyoxometalate Science of Ministry of Education, Department of  
Chemistry, Northeast Normal University, Changchun, Jilin 130024, P.R. China.

Corresponding Author

\*E-mail: hope20130122@163.com, zhangh@nenu.edu.cn (H. Zhang).

|                                |    |
|--------------------------------|----|
| 1. Supplementary Tables .....  | S3 |
| 2. Supplementary Figures. .... | S8 |
| 3. Reference. ....             | S8 |

## Crystal Structure Determinations

The intensity data of the same single crystal **1** before and after coloration were collected on a Rigaku Pilatus 200 K diffractometer using graphite monochromated Mo K $\alpha$  radiation ( $\lambda = 0.71073 \text{ \AA}$ ) and Cu K $\alpha$  radiation ( $\lambda = 1.54056 \text{ \AA}$ ), respectively. The colored sample (**1a**) was illuminated with Cu K $\alpha$  X-ray for 20 min. Data reduction and absorption corrections were performed using Lorentz and polarization effects. The structures were solved by direct methods refined by full-matrix least-squares methods using a suite of SHELX programs via the Olex2 program<sup>s1</sup>. The non-hydrogen atoms were refined with anisotropic displacement parameters. Technical details of data collection and refinement are summarized in Table S1. The main bond lengths and angles of **1** and **1a** are shown in Table S2.

Table S1 Crystallographic data for **1** and **1a**.

| Compound                                                  | <b>1</b>                                                                                       | <b>1a</b>                                                                                      |
|-----------------------------------------------------------|------------------------------------------------------------------------------------------------|------------------------------------------------------------------------------------------------|
| <b>Formula</b>                                            | C <sub>78</sub> H <sub>76</sub> N <sub>6</sub> O <sub>64</sub> W <sub>12</sub> Zn <sub>4</sub> | C <sub>78</sub> H <sub>76</sub> N <sub>6</sub> O <sub>64</sub> W <sub>12</sub> Zn <sub>4</sub> |
| <b>Fw</b>                                                 | 4589.08                                                                                        | 4589.08                                                                                        |
| <b>Crystal system</b>                                     | trigonal                                                                                       | trigonal                                                                                       |
| <b>Space group</b>                                        | R $\bar{3}$                                                                                    | R $\bar{3}$                                                                                    |
| <b>a/(<math>\text{\AA}</math>)</b>                        | 17.9542(4)                                                                                     | 18.0082(3)                                                                                     |
| <b>b/(<math>\text{\AA}</math>)</b>                        | 17.9542(4)                                                                                     | 18.0082(3)                                                                                     |
| <b>c/(<math>\text{\AA}</math>)</b>                        | 27.4233(8)                                                                                     | 27.5563(5)                                                                                     |
| <b><math>\alpha</math>(<math>^\circ</math>)</b>           | 90                                                                                             | 90                                                                                             |
| <b><math>\beta</math>(<math>^\circ</math>)</b>            | 90                                                                                             | 90                                                                                             |
| <b><math>\gamma</math>(<math>^\circ</math>)</b>           | 120                                                                                            | 120                                                                                            |
| <b>Volume/(<math>\text{\AA}^3</math>)</b>                 | 7655.7(12)                                                                                     | 7739.1(3)                                                                                      |
| <b>Z</b>                                                  | 3                                                                                              | 3                                                                                              |
| <b>Temperature/(K)</b>                                    | 100                                                                                            | 293                                                                                            |
| <b><math>\rho_{\text{calc}}</math> (g/cm<sup>3</sup>)</b> | 2.934                                                                                          | 2.944                                                                                          |
| <b>F(000)</b>                                             | 6174.0                                                                                         | 6270.0                                                                                         |
| <b><math>\mu</math>(mm<sup>-1</sup>)</b>                  | 14.485                                                                                         | 25.906                                                                                         |
| <b>Reflections collected</b>                              | 21341                                                                                          | 9168                                                                                           |
| <b>Independent reflections</b>                            | 4404                                                                                           | 3458                                                                                           |
| <b>R1 [<math>I \geq 2\sigma(I)</math>]</b>                | 0.0598                                                                                         | 0.0651                                                                                         |
| <b>wR<sub>2</sub> [all data]</b>                          | 0.1823                                                                                         | 0.1927                                                                                         |
| <b>GOF on F<sup>2</sup></b>                               | 1.028                                                                                          | 1.050                                                                                          |

Table S2. Comparison between selective bond distances (Å) of compounds **1** and **1a**.

| <b>1</b>           |           | <b>1a</b>          |             |
|--------------------|-----------|--------------------|-------------|
| Bond               | Length/Å  | Bond               | Length/Å    |
| W1-O1              | 2.492(14) | W1-O1              | 2.471(13) ↓ |
| W1-O2              | 2.504(14) | W1-O2              | 2.475(12) ↓ |
| W1-O3              | 1.687(10) | W1-O3              | 1.681(10)   |
| W1-O4 <sup>1</sup> | 1.924(11) | W1-O4 <sup>4</sup> | 1.928(11)   |
| W1-O4              | 1.882(11) | W1-O4              | 1.864(11) ↓ |
| W1-O5              | 1.881(11) | W1-O5              | 1.883(10)   |
| W1-O8 <sup>2</sup> | 1.892(10) | W1-O8 <sup>5</sup> | 1.892(11)   |
| W2-O2 <sup>3</sup> | 2.423(13) | W2-O2 <sup>6</sup> | 2.462(11) ↑ |
| W2-O2              | 2.439(13) | W2-O2              | 2.437(12)   |
| W2-O5              | 1.951(12) | W2-O5              | 1.922(10) ↓ |
| W2-O6              | 1.712(10) | W2-O6              | 1.700(9)    |
| W2-O7 <sup>3</sup> | 1.908(10) | W2-O7              | 1.915(10)   |
| W2-O7              | 1.905(10) | W2-O7 <sup>6</sup> | 1.910(10)   |
| W2-O8              | 1.919(11) | W2-O8              | 1.934(11) ↑ |
| Zn1-O1             | 1.53(3)   | Zn1-O1             | 1.56(2) ↑   |
| Zn1-O2             | 1.558(13) | Zn1-O2             | 1.552(13)   |
| Zn2-O10            | 2.064(15) | Zn2-O10            | 2.066(14)   |
| Zn3-O9             | 1.991(17) | Zn3-O9             | 2.006(16)   |
| Zn3-O1W            | 2.13(7)   | Zn3-O1W            | 2.12(6)     |
| O9-C13             | 1.25(2)   | O9-C13             | 1.22(2)     |
| O10-C13            | 1.24(2)   | O10-C13            | 1.26(2)     |
| N1-C6              | 1.53(2)   | N1-C6              | 1.57(2) ↑   |

<sup>1</sup>-Y,+X,-Y,+Z; <sup>2</sup>-Y+X,+X,1-Z; <sup>3</sup>+Y,-X+Y,1-Z; <sup>4</sup>1-Y,1+X-Y,+Z; <sup>5</sup>-1/3+Y,1/3-X+Y,1/3-Z; <sup>6</sup>2/3-Y+X,1/3+X,1/3-Z

Table S3. Photoresponsive rate of some viologen-based photochromic hybrids.

| Compound                                                                                                                                                              | Photoresponsive rate (s <sup>-1</sup> ) | Ref.      |
|-----------------------------------------------------------------------------------------------------------------------------------------------------------------------|-----------------------------------------|-----------|
| [(AV <sup>2+</sup> )(p-AV)(EuW <sub>10</sub> O <sub>36</sub> ) <sub>n</sub> ·2nH <sub>2</sub> O]                                                                      | 1.27×10 <sup>-2</sup>                   | [S2]      |
| ZnW <sub>12</sub> @MV                                                                                                                                                 | 1.39×10 <sup>-2</sup>                   | This work |
| {Cu(1,1-pmbby) <sub>2</sub> (H <sub>2</sub> O)[H <sub>2</sub> (β-Mo <sub>8</sub> O <sub>26</sub> ) <sub>2</sub> ]}·5H <sub>2</sub> O·C <sub>2</sub> H <sub>7</sub> N  | 2.38×10 <sup>-2</sup>                   | [S3]      |
| {Co(1,4-bcbpy) <sub>2</sub> (H <sub>2</sub> O) <sub>2</sub> [H <sub>2</sub> (β-Mo <sub>8</sub> O <sub>26</sub> ) <sub>2</sub> ]}·2H <sub>2</sub> O·2CH <sub>2</sub> O | 2.601×10 <sup>-2</sup>                  | [S3]      |
| [Zn(CPBPY) <sub>2</sub> (H <sub>2</sub> O) <sub>3</sub> ]PF <sub>6</sub> ·NO <sub>3</sub> ·4H <sub>2</sub> O                                                          | 4.60×10 <sup>-2</sup>                   | [S4]      |
| [Zn <sub>7</sub> (bpybc) <sub>3</sub> (o-BDC) <sub>6</sub> ]·2NO <sub>3</sub> ·6H <sub>2</sub> O                                                                      | 6×10 <sup>-3</sup>                      | [S5]      |
| {[Zn(Mebpy)(Hbtc)Cl]·2H <sub>2</sub> O} <sub>n</sub>                                                                                                                  | 5.33×10 <sup>-3</sup>                   | [S6]      |
| {[Zn <sub>3</sub> (Cebpy) <sub>2</sub> (Hbtc)(H <sub>2</sub> btc) <sub>2</sub> (OH) <sub>2</sub> ]·4H <sub>2</sub> O} <sub>n</sub>                                    | 4.29×10 <sup>-3</sup>                   | [S6]      |
| [Zn(CPBPY)(HBTC)]·H <sub>2</sub> O                                                                                                                                    | 5.4×10 <sup>-4</sup>                    | [S7]      |

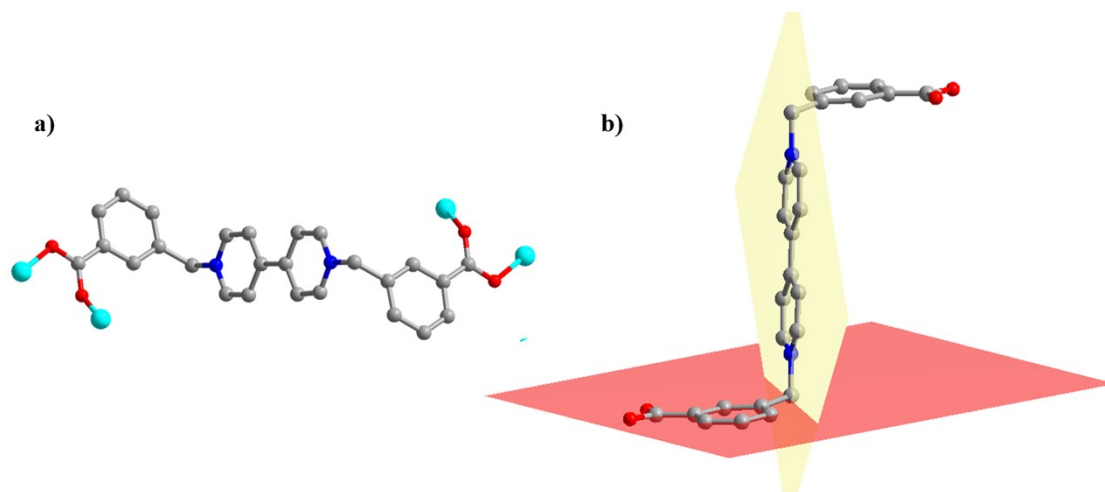

**Figure S1** (a) Coordination mode of the Bcbpy in **1**. (b) The dihedral angle between the pyridine ring and the benzene ring.

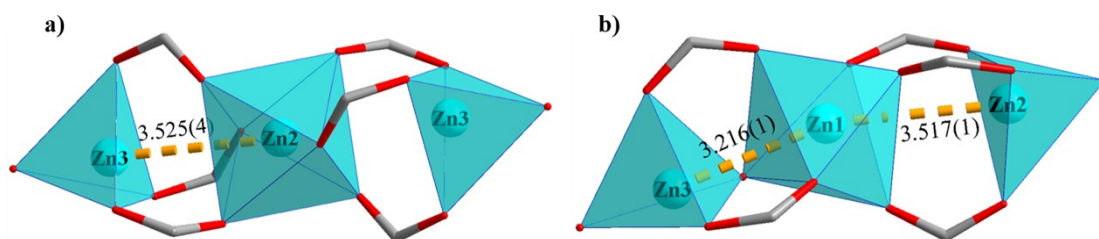

**Figure S2** (a) The trinuclear Zn<sub>3</sub>O<sub>14</sub>C<sub>6</sub> cluster (Zn<sub>3</sub>SBU) of **1**. (b) The trinuclear Zn<sub>3</sub>O<sub>13</sub>C<sub>6</sub> cluster of PNMOF-1.

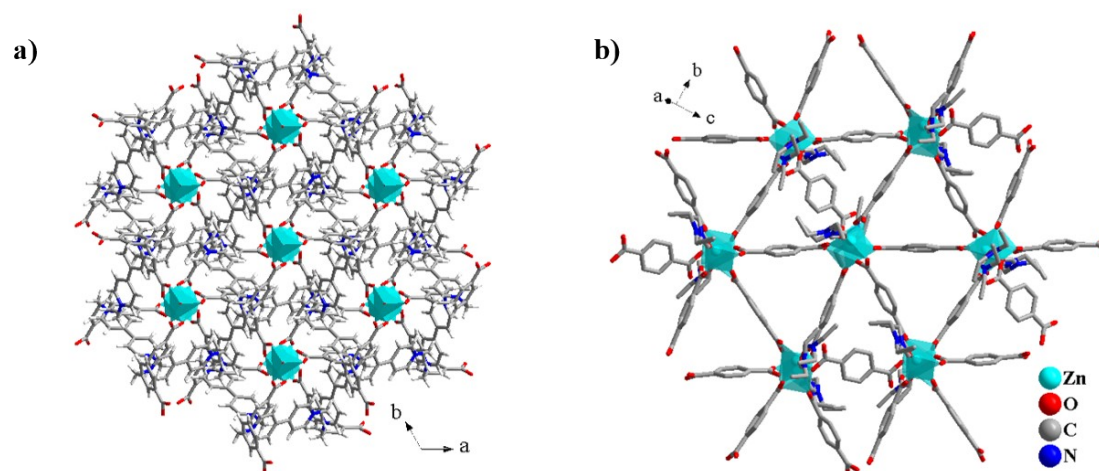

**Figure S3** (a) The 3D zinc-viologen cationic Zn<sub>3</sub>(Bcbpy)<sub>6</sub>(H<sub>2</sub>O)<sub>2n</sub><sup>6n+</sup> network. (b) The 2D network of Zn<sub>3</sub>(BDC)<sub>3</sub>(DEF)<sub>2</sub>.

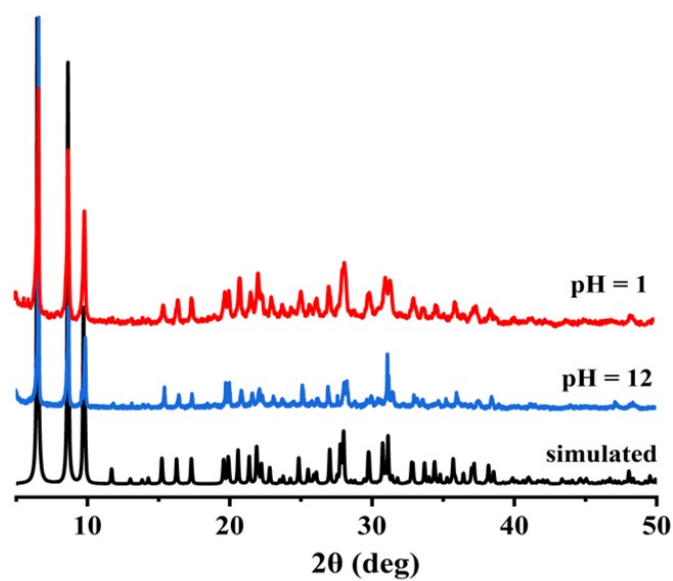

**Figure S4** PXRD patterns of **1** immersed in  $\text{H}_2\text{SO}_4$  solutions (pH = 1) and NaOH solutions (pH = 12).

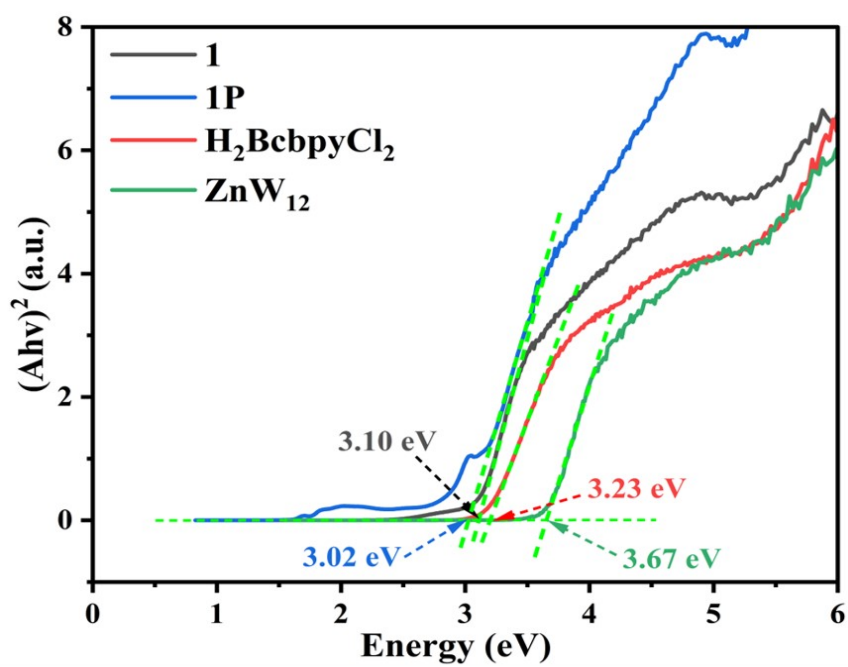

**Figure S5** The UV-vis spectra of **1**, **1P**,  $\text{H}_2\text{BcbpyCl}_2$  and  $\text{ZnW}_{12}$  at room temperature.

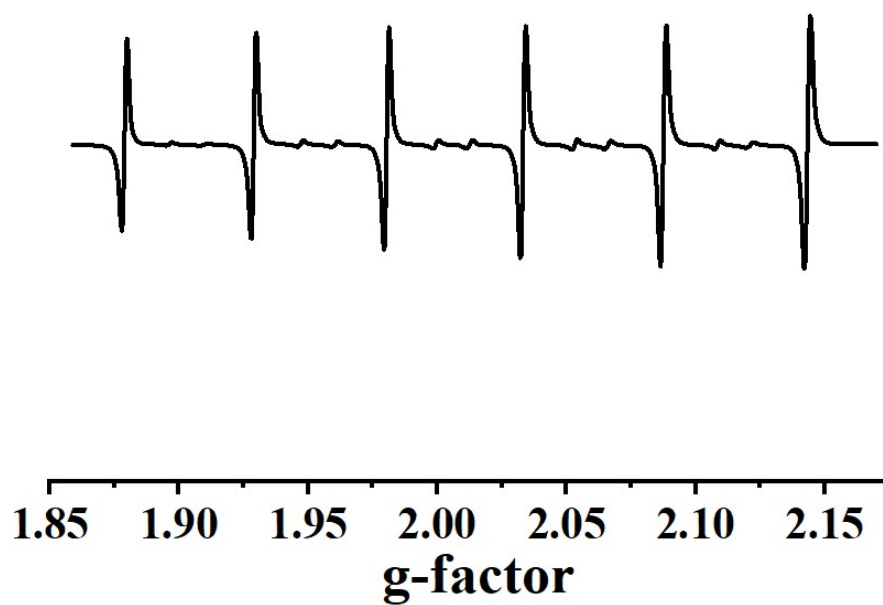

**Figure S6** The EPR spectra of **1**.

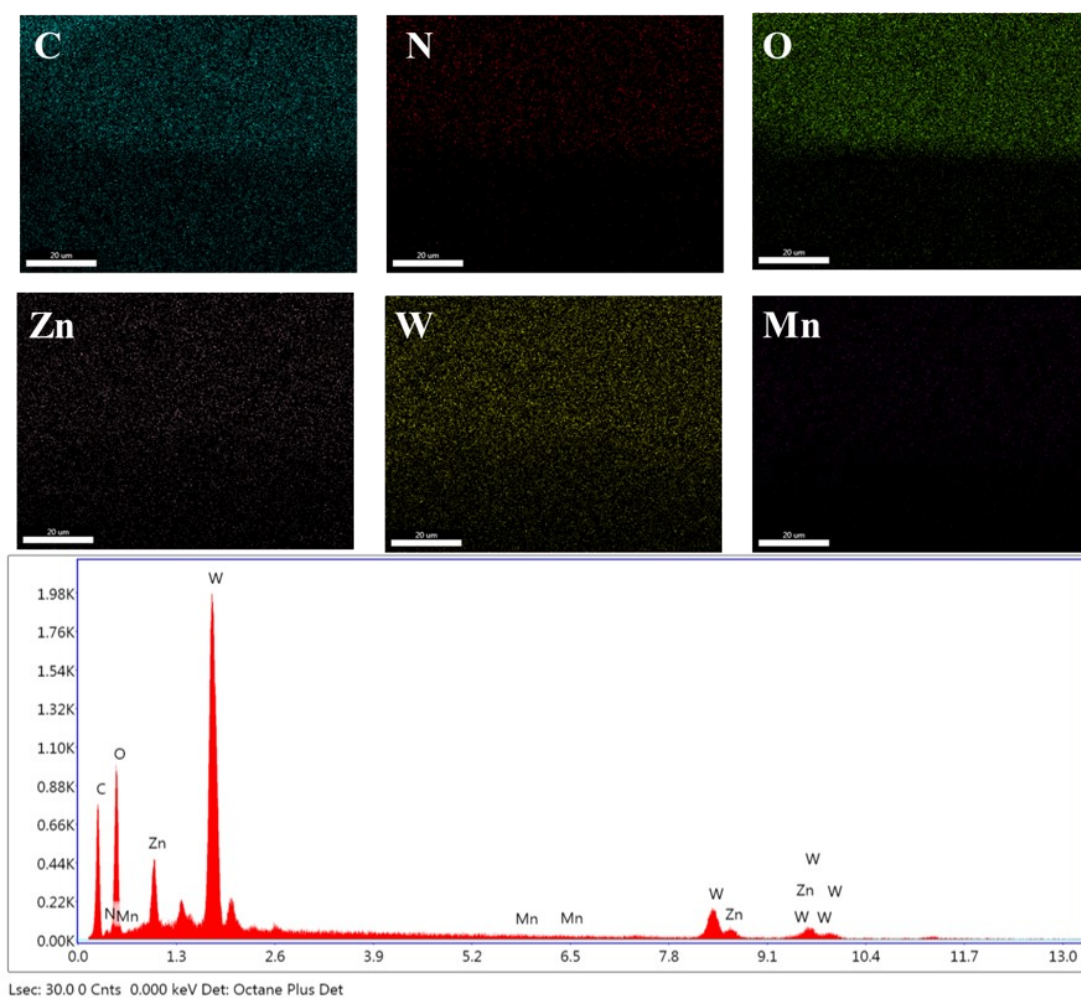

**Figure S7** The EDS elemental mapping images and spectrum of **1**.

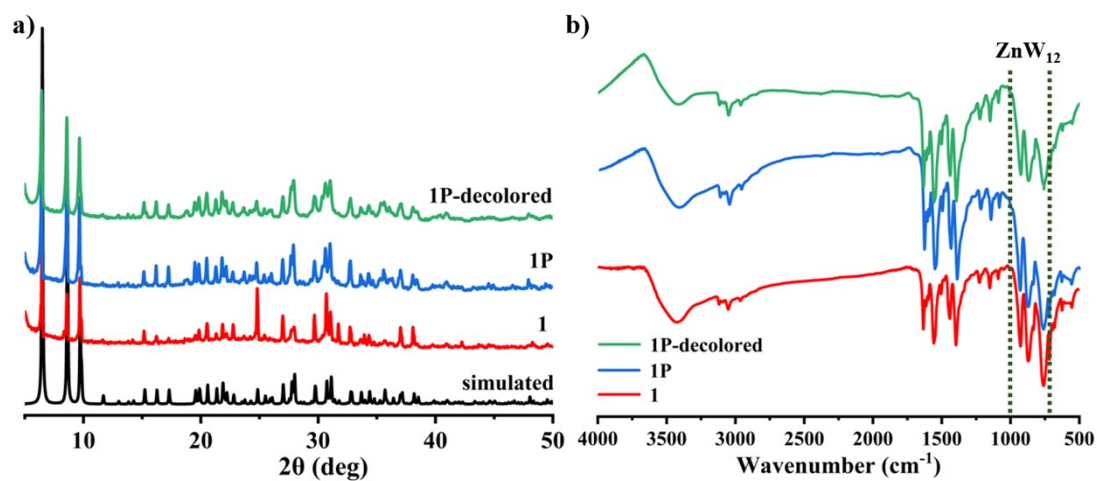

**Figure S8** (a) Simulated, experimental, photochromic, and decolored PXRD patterns of **1**. (b) IR spectra of **1** before and after coloration.

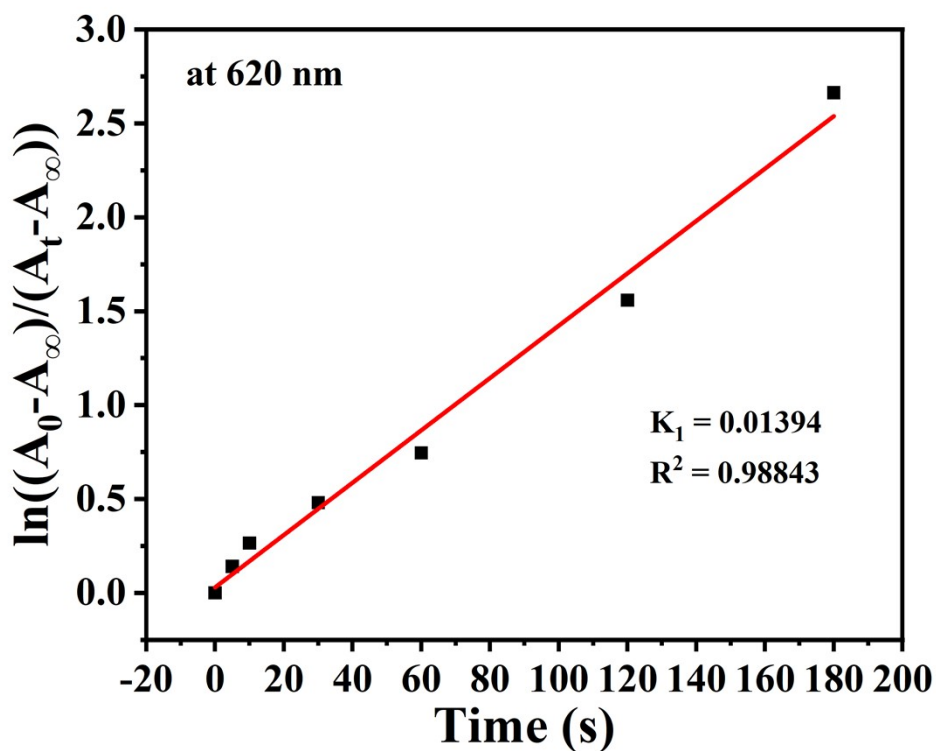

**Figure S9** Solid state photoresponsive rate plots of **1** upon photo-irradiation based on UV absorption at 620 nm.

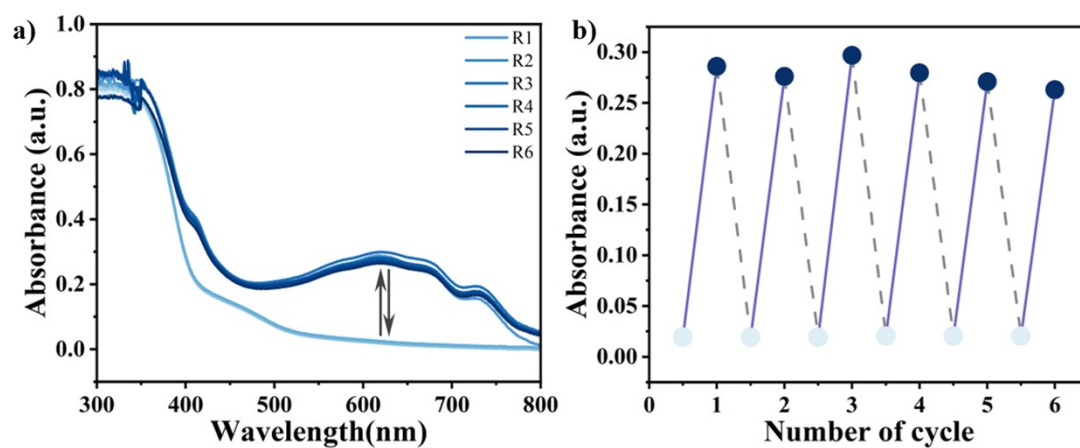

**Figure S10** (a) The photochromic of the color change in 6 cycles. (b) The absorbance at  $\lambda=620$  nm in the photochromism-decoloration cycles of **1**.

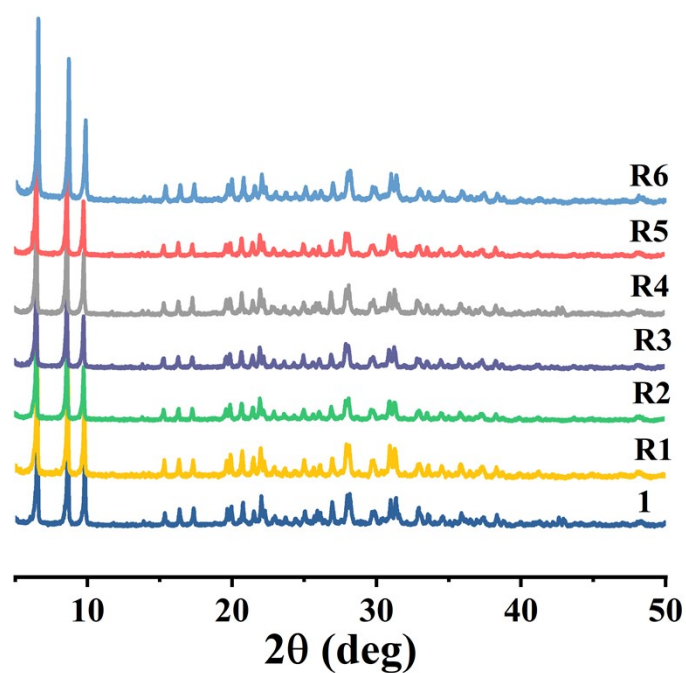

**Figure S11** The PXRD patterns of colored sample **1** in the 6 cycles.



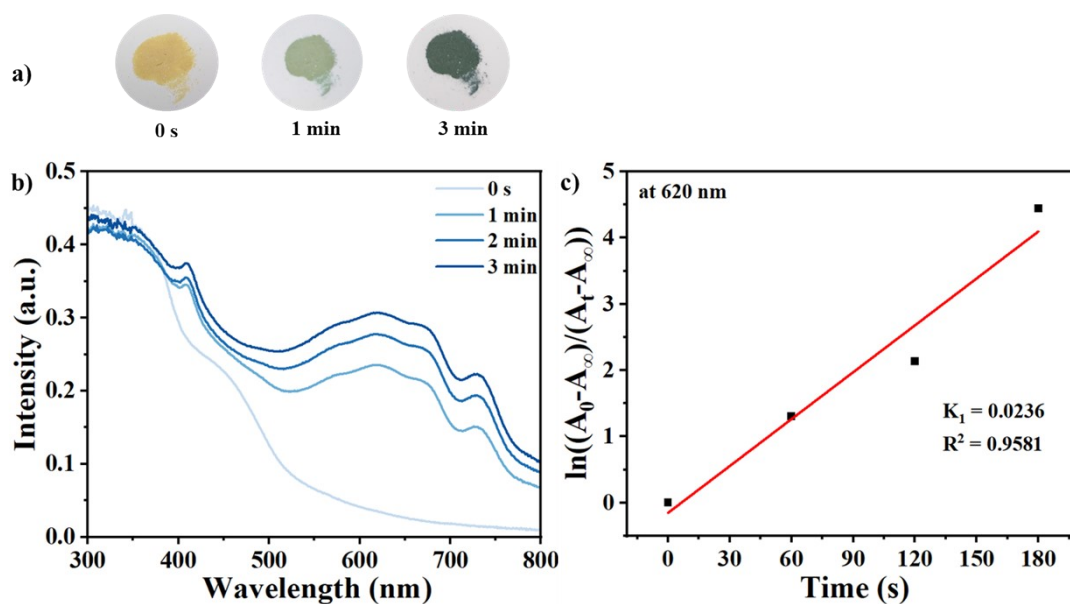

**Figure S12** (a) The color transitions process of **1T**. (b) The in-situ solid-state UV-vis spectra of **1T**. (c) Solid state photoresponsive rate plots of **1T** upon photo-irradiation based on UV absorption at 620 nm.

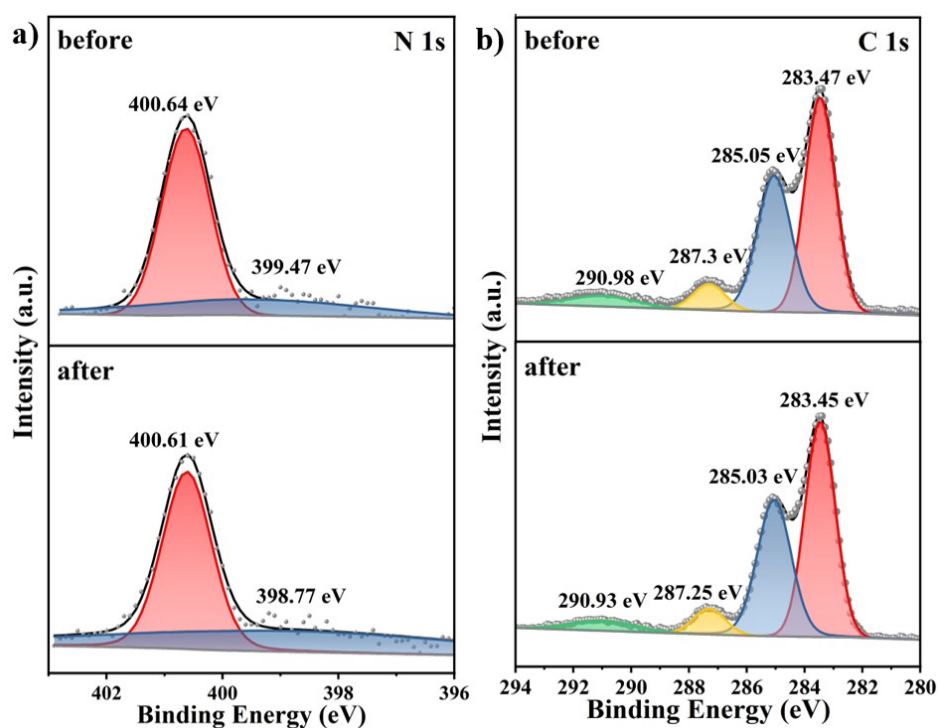

**Figure S13** The XPS spectrum of **1** before and after UV photoirradiation: (a) N 1s, (b) C 1s.

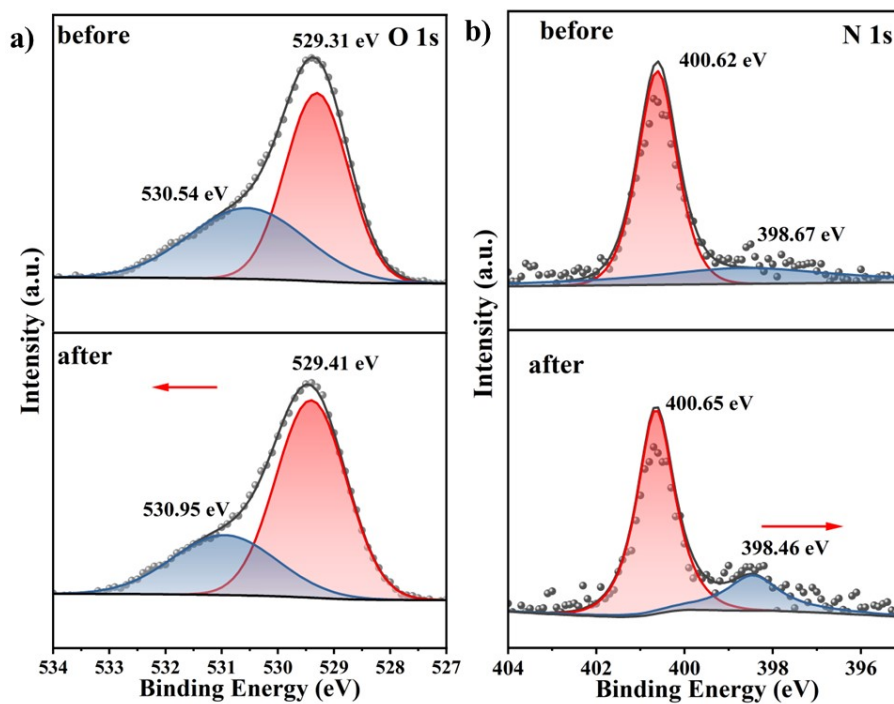

**Figure S14** The XPS spectrum of **1** before and after X-ray photoirradiation: (a) O 1s, (b) N 1s.

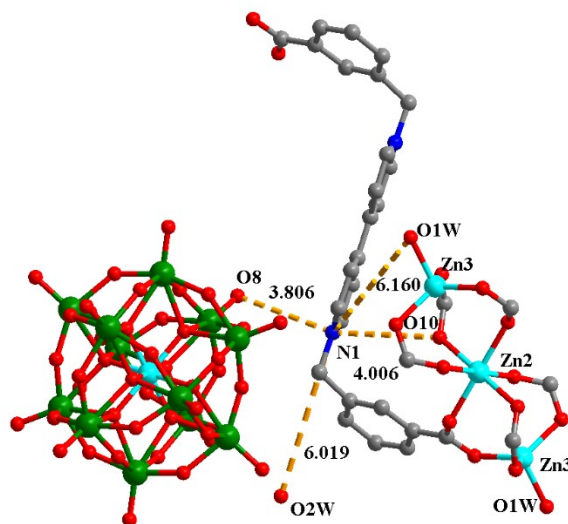

**Figure S15** The selected distances between the O atoms (from ZnW<sub>12</sub>, Bcbpy and H<sub>2</sub>O molecules) to the N atoms from bipyridinium.

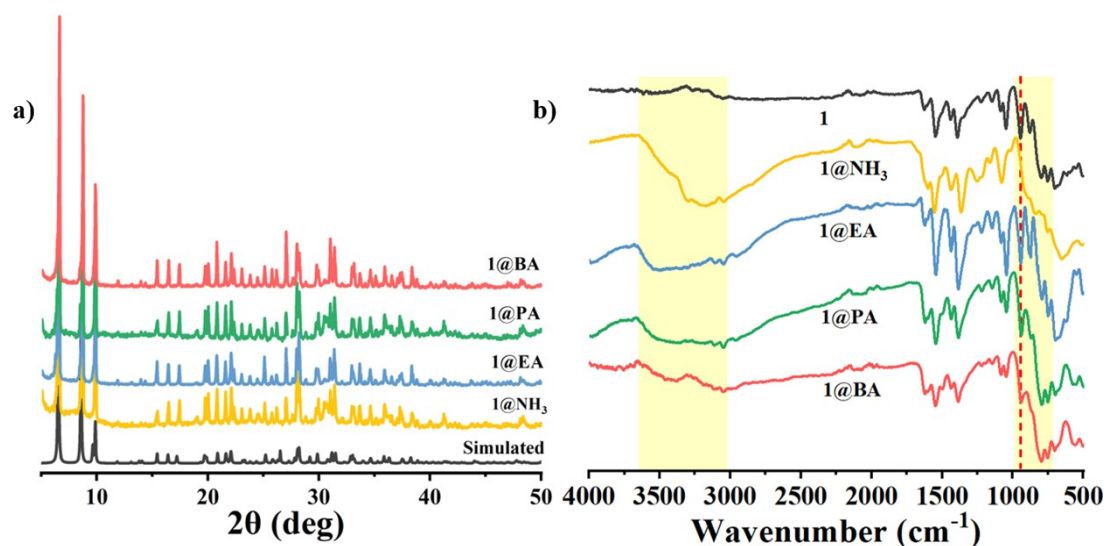

**Figure S16** The PXRD patterns (a) and IR spectra (b) of **1** after exposure to different amines.

## References

- [S1] Sheldrick, G.M. A short history of SHELXL, *Acta Crystallogr Sect. A Found. Crystallogr.* **2008**, *64*, 112–122.
- [S2] D.-F. Shen, S. Li, H. Liu, W. Jiang, Q. Zhang and G.-G. Gao, *Journal of Materials Chemistry C* **2015**, *3*, 12090-12097.
- [S3] S. Yu, T. Liu, J. Ying, A.-X. Tian, M.-L. Yang and X.-L. Wang, *Dalton Trans.* **2023**.
- [S4] Y.-Y. Zhang, H.-C. Wang, P. Li, X.-X. Jin, B.-W. Wang, L. Wang, R.-J. Li and Q. Sui, *Chem. Eur. J.* **2023**, e202302397.
- [S5] S.-L. Li, M. Han, Y. Zhang, G.-P. Li, M. Li, G. He and X.-M. Zhang, *J. Am. Chem. Soc.* **2019**, *141*, 12663-12672.
- [S6] Q. Shi, S.-Y. Wu, X.-T. Qiu, Y.-Q. Sun and S.-T. Zheng, *Dalton Transactions*

**2019**, 48, 954-963.

[7] J. Zhang, Y. Zeng, H.-C. Lu, X.-H. Chen, X.-Z. Yuan and Z.-Y. Fu, *Cryst. Growth*

*Des.* **2020**, 20, 2617-2622.
